# Supplementary material
Source: HighWire-hosted journal article supplement (https://bmjpaedsopen.bmj.com/content/3/1/e000420)
Supplement: inline-supplementary-material-1 [file inline-supplementary-material-1.pdf]

Supplemental table one. Legislation passed by the Scottish Government and the UK Government. UK legislation applies to England and Scotland (and Wales and Northern Ireland). Scottish legislation only applies to Scotland.

| Scottish legislation                                                                               | Theme                                     | Equivalent or related UK legislation                                                                        |
|----------------------------------------------------------------------------------------------------|-------------------------------------------|-------------------------------------------------------------------------------------------------------------|
| Regulation of Care (Scotland) Act 2001                                                             | Welfare                                   |                                                                                                             |
| Education (Disability Strategies and Pupils' Educational Records) (Scotland) Act 2002              | Education                                 | Education Act 2002                                                                                          |
| Protection of Children (Scotland) Act 2003                                                         | Child protection                          | Protection of children act 1999                                                                             |
| Criminal Justice (Scotland) Act 2003                                                               | Child protection                          |                                                                                                             |
| Mental Health (Care and Treatment) (Scotland) Act 2003                                             | Detention of people with mental disorders |                                                                                                             |
| Commissioner for Children and Young People (Scotland) Act 2003                                     |                                           | Children Act 2004                                                                                           |
| Vulnerable Witnesses (Scotland) Act 2004                                                           |                                           |                                                                                                             |
| Education (Additional Support for Learning) (Scotland) Act 2004                                    | Education                                 |                                                                                                             |
| Antisocial Behaviour etc. (Scotland) Act 2004                                                      | Welfare                                   | Antisocial Behaviour act 2003                                                                               |
| Prohibition of Female Genital Mutilation (Scotland) Act 2005                                       | Child protection                          | Female Genital Mutilation Act 2003<br>Children Act 1989 (Amendment)<br>(Female Genital Mutilation) Act 2019 |
| Protection of Children and Prevention of Sexual Offences (Scotland) Act 2005                       | Child protection                          | Sexual Offences Act 2003                                                                                    |
| Smoking, Health and Social Care (Scotland) Act 2005                                                | Smoking                                   |                                                                                                             |
| Joint Inspection of Children's Services and Inspection of Social Work Services (Scotland) Act 2006 | Welfare                                   |                                                                                                             |
| Adoption and Children (Scotland) Act 2007                                                          | Welfare                                   | Adoption and Children Act 2002<br>Children and Adoption Act 2006                                            |
| Protection of Vulnerable Groups (Scotland) Act 2007                                                | Welfare/Child protection                  | Safeguarding Vulnerable Groups Act 2006                                                                     |
| Schools (Health Promotion and Nutrition) (Scotland) Act 2007                                       | Diet                                      | The Education (Nutritional Standards and Requirements for School Food) (England) Regulations 2007           |
| Education (Additional Support for Learning) (Scotland) Act 2009                                    | Education                                 | Children schools and families act 2010                                                                      |
| Tobacco and Primary Medical Services (Scotland) Act 2010                                           | Smoking                                   | Tobacco Advertising and Promotion Act 2002                                                                  |
| Alcohol etc. (Scotland) Act 2010                                                                   | Alcohol                                   |                                                                                                             |

|                                                         |         |                                                                       |
|---------------------------------------------------------|---------|-----------------------------------------------------------------------|
| Patient Rights (Scotland) Act 2011                      |         |                                                                       |
| Social Care (Self-directed Support) (Scotland) Act 2013 | Welfare | Children and social work act 2017                                     |
| Children and Young People (Scotland) Act 2014           | Welfare | Children and Young Persons Act 2008<br>Children and families act 2014 |
| Child Poverty (Scotland) Act 2017                       | Welfare | Child Poverty act 2010                                                |

Supplemental table two. Strategies from the Westminster government for England ("English strategies") and from the Holyrood parliament for Scotland ("Scottish strategies")

|                                         | English strategies                                                                                                                                                                                                                                                                                                                                                                                                                                                                                                                 | Scottish strategies                                                                                                                                                                                                                                                                                 |
|-----------------------------------------|------------------------------------------------------------------------------------------------------------------------------------------------------------------------------------------------------------------------------------------------------------------------------------------------------------------------------------------------------------------------------------------------------------------------------------------------------------------------------------------------------------------------------------|-----------------------------------------------------------------------------------------------------------------------------------------------------------------------------------------------------------------------------------------------------------------------------------------------------|
| <b>Social care/child care/adoption</b>  | Care matters: transforming the lives of children and young people in care-2006<br>Care matters: time for change-2007<br>2010 to 2015 government policy: children's social workers<br>2010 to 2015 government policy: childcare and early education<br>2010 to 2015 government policy: looked-after children and adoption<br>Adoption action plan-2012<br>Care leaver strategy-2013<br>Keep on caring: supporting young people from care to independence-2016<br>Putting children first: our vision for children's social care-2016 | Choices for Children in Fostering and Adoption (2003)<br>Looked After Children and Young People: We Can and Must Do Better<br>Independent Care Review (2017)<br>Early Learning and Childcare Expansion (2019)                                                                                       |
| <b>Education</b>                        | The importance of teaching: the school's white paper 2010<br>2010 to 2015 government policy: childcare and early education<br>2010 to 2015 government policy: school behaviour and attendance<br>2010 to 2015 government policy: academies and free schools<br>2010 to 2015 government policy: education of disadvantaged children<br>Educational excellence everywhere-2016<br>Unlocking Talent, Fulfilling Potential-2017                                                                                                        | More Choices, More Chances: A Strategy to Reduce the Proportion of Young People not in Education, Employment or Training in Scotland (2006)<br>15-24 Learner Journey Review (2016)<br>National Improvement Framework for Scottish Education (2016)<br>Early Learning and Childcare Expansion (2019) |
| <b>Alcohol/smoking/illicit drug use</b> | Youth alcohol action plan-2008<br>2010 to 2015 government policy: smoking<br>2010 to 2015 government policy: drug misuse and dependency<br>2010 to 2015 government policy: harmful drinking<br>The tobacco control plan for England-2011<br>alcohol strategy 2012<br>prevention of drug and alcohol dependence-2015<br>Drug strategy 2017                                                                                                                                                                                          | The Road to Recovery: A New Approach to Tackling Scotland's Drug Problem (2008)<br>Changing Scotland's Relationship with Alcohol: A Framework For Action (2009)<br>Tobacco Control Strategy – Creating a Tobacco-Free Generation (2013)                                                             |

|                                                          |                                                                                                                                                                                                                                                                                                                                                             |                                                                                                                                                                                                                                                                                                                                                                                                                                                      |
|----------------------------------------------------------|-------------------------------------------------------------------------------------------------------------------------------------------------------------------------------------------------------------------------------------------------------------------------------------------------------------------------------------------------------------|------------------------------------------------------------------------------------------------------------------------------------------------------------------------------------------------------------------------------------------------------------------------------------------------------------------------------------------------------------------------------------------------------------------------------------------------------|
| <b>Poverty</b>                                           | 2010 to 2015 government policy: education of disadvantaged children<br>A new approach to child poverty: tackling the causes of disadvantage and transforming families' lives-2011<br>Child poverty strategy 2014 to 2017                                                                                                                                    | Achieving Our Potential: A Framework for Tackling Poverty and Income Inequality in Scotland (2008)<br>Independent Advisor review for Poverty and Inequality 'Shifting the Curve' Fairer Scotland Action Plan (2016)                                                                                                                                                                                                                                  |
| <b>Public health/Obesity/healthy lifestyle/nutrition</b> | The public health white paper 2010<br>2010 to 2015 government policy: sports participation<br>2010 to 2015 government policy: obesity and healthy eating<br>Healthy Lives, Healthy People: update and way forward-2011<br>Creating a sporting habit for life - A new youth sport strategy-2012<br>Childhood obesity: a plan for action-2016                 | Healthy Eating, Active Living: An action plan to improve diet, increase physical activity and tackle obesity (2008-2011) (2008)<br>National Walking Strategy (2014)<br>A Long-term Vision for Active Travel in Scotland 2030 (2014)<br>Cycling Action Plan for Scotland 2017-2020<br>Active Scotland Delivery Plan (2018)<br>Scotland's Public Health Priorities (2018)<br>A Healthier Future: Scotland's Diet & Healthy Weight Delivery Plan (2018) |
| <b>Safeguarding/violence/sexual assault</b>              | Sex and violence: improving your care (young people's version)-2010<br>Tackling child sexual exploitation: action plan-2011<br>Public health approach to violence prevention outlined-2012<br>Working together to safeguard children-2015<br>Tackling child sexual exploitation-2015<br>Safeguarding unaccompanied asylum seeking and refugee children-2017 | It's everyone's job to make sure "I'm alright" (2003)<br>Protecting Children and Young People: The Charter (2004)<br>Protecting Children – A Shared Responsibility (2006)<br>Equally Safe: Scotland's strategy for preventing and eradicating violence against women and girls (2014)<br>Scotland's National Action Plan to Prevent and Eradicate Female Genital Mutilation (2016)<br>National Missing Persons Framework for Scotland (2017)         |
| <b>Maternal/Early years</b>                              | Midwifery 2020: Delivering expectations-2008<br>Healthy Child Programme: Pregnancy and the First 5 Years of Life-2009<br>Supporting families in the foundation years-2011<br>Supporting families in the foundation years-2016<br>Safer maternity care-2016                                                                                                  | Early Years Framework (2009)<br>Refreshed Maternity Framework (2011)<br>Improving Maternal and Infant Nutrition Framework (2011)<br>Universal Health Visiting Pathway in Scotland (2016)<br>Scotland's Baby Boxes (2017)<br>Best Start: A Five-Year Forward Plan for Maternity and Neonatal Care in Scotland (2017)                                                                                                                                  |
| <b>Parental and family support</b>                       | 2010 to 2015 government policy: support for families<br>Troubled families programme 2012-2015                                                                                                                                                                                                                                                               | Your Children Matter - A guide for parents on parental responsibilities and rights (2003)                                                                                                                                                                                                                                                                                                                                                            |

|                                      |                                                                                                                                                                                                                                                                         |                                                                                                                                                                                                                                                                                                                                                                                                                                                                                                                                                                                                                                         |
|--------------------------------------|-------------------------------------------------------------------------------------------------------------------------------------------------------------------------------------------------------------------------------------------------------------------------|-----------------------------------------------------------------------------------------------------------------------------------------------------------------------------------------------------------------------------------------------------------------------------------------------------------------------------------------------------------------------------------------------------------------------------------------------------------------------------------------------------------------------------------------------------------------------------------------------------------------------------------------|
|                                      | Troubled Families Programme 2015 to 2020                                                                                                                                                                                                                                | Getting It Right for Every Child (2008 – Present)<br>Growing up in Scotland: parenting and children's health (2011)<br>National Parenting Strategy: Making a positive difference to children and young people through parenting (2012)                                                                                                                                                                                                                                                                                                                                                                                                  |
| <b>Mental Health</b>                 | 2010 to 2015 government policy: mental health service reform<br>No Health Without Mental Health-2011<br>Prevention concordat for better mental health: consensus statement-2017<br>Transforming children and young people's mental health provision: a green paper-2017 | Children and Young People's Mental Health: A Framework for Promotion, Prevention and Care (2005)<br>The Mental Health of Children and Young People: A Framework for Promotion,<br>Delivering for Mental Health Scottish Executive, 2006<br>Prevention and Care Scottish Executive, 2005<br>Mental Health Strategy (2017-27)<br>CAMHS Taskforce (2018)                                                                                                                                                                                                                                                                                   |
| <b>Disability/special needs</b>      | Back on track: a strategy for modernising alternative provision for young people-2008<br>2010 to 2015 government policy: special educational needs and disability (SEND)                                                                                                | Scottish Executive (1999) A Manual of Good Practice in Special Educational Needs.<br>The Scottish Strategy for Autism (2011)<br>Keys to Life – Scotland's Learning Disability Strategy (2013)<br>The Scottish Strategy for Autism Outcomes and Priorities 2018-2021                                                                                                                                                                                                                                                                                                                                                                     |
| <b>"The NHS"</b>                     | The NHS mandate-2012<br>2010 to 2015 government policy: compassionate care in the NHS<br>Personalised health and care 2020-2014                                                                                                                                         | Scottish Executive (1999) Learning Together: A Strategy for Education, Training and Lifelong Learning for all staff in the National Health Service in Scotland.<br>Scottish Executive Health Department (2001) Patient Focus and Public Involvement.<br>Building a health service fit for the future: a national framework for service change in the NHS in Scotland ("The Kerr Report") Scottish Executive, 2005<br>Better Health, Better Care: Action Plan. Edinburgh: Scottish Government; 2007<br>The Healthcare Quality Strategy for NHSScotland (2010)<br>Developing a community child health service for the 21st century (2012) |
| <b>General child health policies</b> | Sure start-1998<br>Every child matters-2003<br>The children's plan-2007                                                                                                                                                                                                 | Scottish Executive (2000) A Joint Future: Report of the Joint Future Group                                                                                                                                                                                                                                                                                                                                                                                                                                                                                                                                                              |

|                                |                                                                                                                                                                                                                                                                                                                                                                     |                                                                                                                                                                                                                                                                                                                                                                                                                                                                                                                                                                                                                                                                                                                                           |
|--------------------------------|---------------------------------------------------------------------------------------------------------------------------------------------------------------------------------------------------------------------------------------------------------------------------------------------------------------------------------------------------------------------|-------------------------------------------------------------------------------------------------------------------------------------------------------------------------------------------------------------------------------------------------------------------------------------------------------------------------------------------------------------------------------------------------------------------------------------------------------------------------------------------------------------------------------------------------------------------------------------------------------------------------------------------------------------------------------------------------------------------------------------------|
|                                | Achieving equity and excellence for children-2010<br>2010 to 2015 government policy: children's health<br>2010 to 2015 government policy: young people<br>Department of Health Equality Objectives 2012 to 2016                                                                                                                                                     | Scottish Executive Health Department (2000) Our National Health: a Plan for Action, a Plan for Change<br>Scottish Executive Health Department (2000) Walk the Talk: Developing Appropriate and Accessible Health Services for Young People Fair For All Scottish Executive, 2001-<br>Health for All Children 4: Guidance on Implementation in Scotland (Hall 4) Scottish Executive, 2005<br>Scottish Executive 2007<br>Delivering a Healthy Future: An Action Framework for Children and Young People's Health in Scotland Scottish Executive, 2007<br>Valuing Young People (2009)<br>Children and Young People Improvement Collaborative (2012 – Present)<br>Getting It Right for Looked After Children And Young People Strategy (2015) |
| <b>Integration of services</b> |                                                                                                                                                                                                                                                                                                                                                                     | Scottish Executive Education Department (2001) For Scotland's Children: Towards Better Integrated Children's Services.<br>Scottish Executive (2002) Planning Together: Final Report of the Scottish Integrated Workforce Planning Group.<br>Exploring the evidence base for integrated children's services (2006)                                                                                                                                                                                                                                                                                                                                                                                                                         |
| <b>Miscellaneous</b>           | A new system of child maintenance-2006<br>2010 to 2015 government policy: child maintenance reform<br>Child maintenance – Arrears and compliance strategy 2012 to 2017<br>Preventing extremism in the education and children's services sectors-2015<br>Protecting learners from radicalisation: the prevent duty-2016<br>Internet Safety Strategy green paper-2017 | Getting it Right for Young Carers: The Young Carers Strategy for Scotland (2010)<br>Homes Fit for the 21st Century: The Scottish Government's Strategy and Action Plan for Housing in the Next Decade (2011-2020)<br>Promotion of Daily Mail (2012 – Present)<br>Play Strategy for Scotland: Our Vision (2013)<br>Developing the Young Workforce – Scotland's Youth Employment Strategy (2014)<br>eHealth Strategy (2014-2017)<br>Preventing Offending: Getting it right for children and young people (2015)<br>Respect for All: A National Approach to Anti-Bullying for Scotland's Children and Young People (2017)                                                                                                                    |

|  |  |                                                                                                                                                  |
|--|--|--------------------------------------------------------------------------------------------------------------------------------------------------|
|  |  | National Action Plan on Internet Safety for Children & Young People (2017)<br>Oral Health Improvement Plan (2018)<br>Year of Young People (2018) |
|--|--|--------------------------------------------------------------------------------------------------------------------------------------------------|
